# Supplementary material for: Improving upconversion luminescence intensity of BiTa7O19:Er3+/Yb3+ by polyvalent Sb co-doping
Source: Royal Society of Chemistry journal article supplement (doi:10.1039/d3dt01075a), 2023-01-01
Supplement: d3dt01075a1.pdf [file d3dt01075a1.pdf]

## Improving upconversion luminescence intensity of $\text{BiTa}_7\text{O}_{19}:\text{Er}^{3+}/\text{Yb}^{3+}$ by polyvalent Sb co-doping

Lei Li<sup>a</sup>, Yongze Cao<sup>a,\*</sup>, Hongqiang Cui<sup>a</sup>, Guojian Li<sup>b</sup>, Ying Li<sup>c</sup>, Yuhang Zhang<sup>a</sup>, Jinsu Zhang<sup>a</sup>, Baojiu Chen<sup>a,\*</sup>

<sup>a</sup>Department of Physics, Dalian Maritime University, Dalian, 116026, China

<sup>b</sup>Key Laboratory of Electromagnetic Processing of Materials (Ministry of Education), Northeastern University, Shenyang 110819, China

<sup>c</sup>Navigation College, Dalian Maritime University, Dalian, 116026, China

\*Corresponding authors: cyz@dmlu.edu.cn; bjchen@dmlu.edu.cn (B. Chen)

### Supplementary data

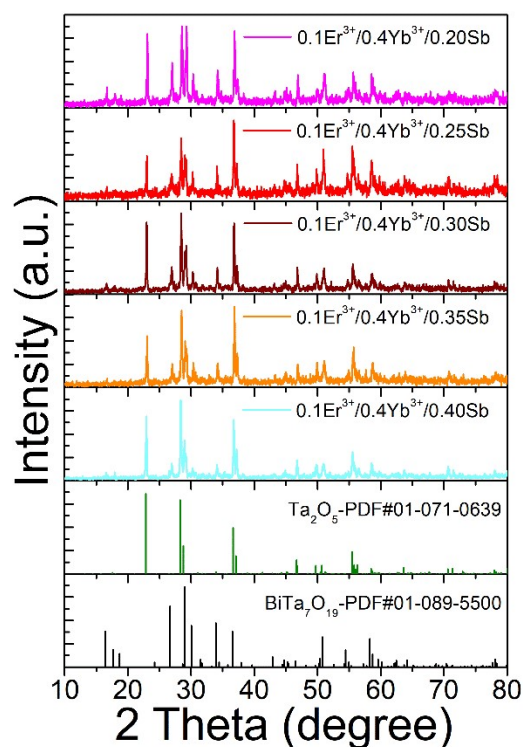

Fig. S1. XRD patterns of  $\text{BiTa}_7\text{O}_{19}:\text{0.1Er}^{3+}/\text{0.4Yb}^{3+}/\text{xSb}$  ( $x = 0.20, 0.25, 0.30, 0.35, 0.40$ ) phosphors by firing at  $1200^\circ\text{C}$  without optimization and references  $\text{Ta}_2\text{O}_5$  PDF#01-071-0639 and  $\text{BiTa}_7\text{O}_{19}$  PDF#01-089-5500.

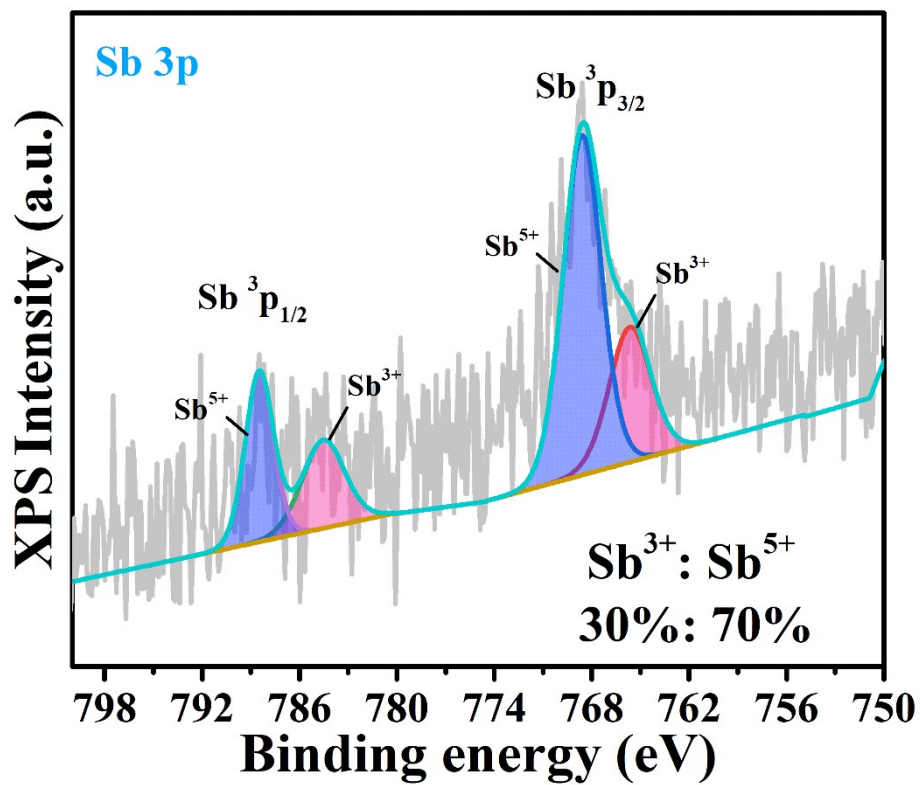

Fig. S2. XPS spectrum of antimony in  $BiTa_7O_{19}:0.1Er^{3+}/0.4Yb^{3+}/0.35Sb$  phosphor by firing at  $1200^\circ C$ .
